# Supplementary material for: Oxidation of CO by N2O over Al- and Ti-doped graphene: a comparative study
Source: Royal Society of Chemistry journal article supplement (doi:10.1039/c6ra04326g), 2016-01-01

# “Supporting Information”

## **Oxidation of CO by N<sub>2</sub>O over Al- and Ti-doped graphene: A comparative study**

Mehdi D. Esrafil<sup>\*</sup>, Fariba Mohammadian-Sabet, Parisa Nematollahi

Laboratory of Theoretical Chemistry, Department of Chemistry, University of Maragheh, Maragheh, Iran

<sup>\*</sup>Corresponding author. **Tel:** (+98) 4212237955, **Fax:** (+98) 4212276060, **P.O. Box:** 5513864596. **E-mail:** [esrafil@maragheh.ac.ir](mailto:esrafil@maragheh.ac.ir) (Mehdi D. Esrafil).

**Figure S1.** The energy profile for the diffusion of M=Al or Ti atom on the graphene. IS, TS and FS represent initial structure, transition structure and final structure, respectively.

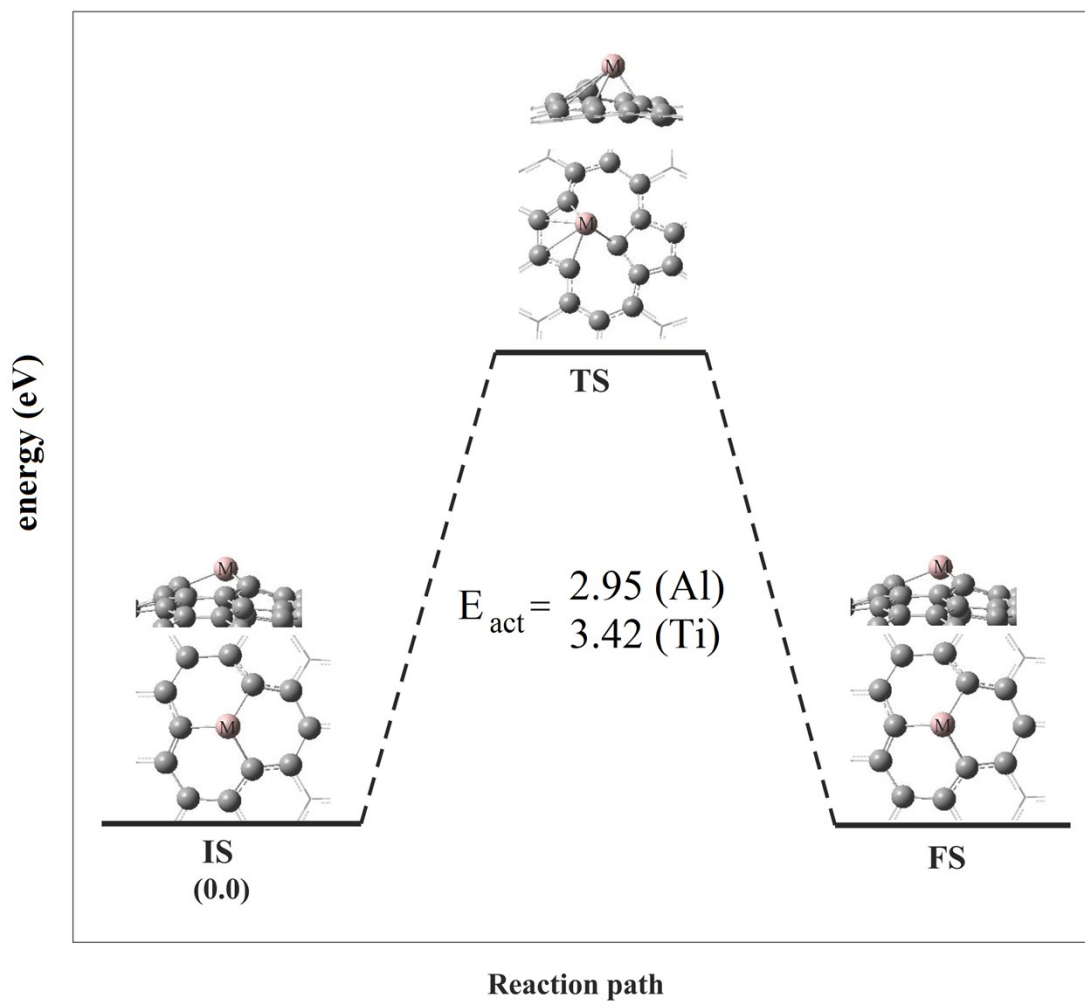

**Figure S2.** Schematic energy profile corresponding to local configurations along the  $\text{O}_{\text{ads}} + \text{N}_2\text{O} \rightarrow \text{N}_2 + \text{O}_2$  reaction pathway over Al-/Ti-graphene sheet. All energies and bond distances are in eV and Å, respectively.

### Al-graphene

IS-4

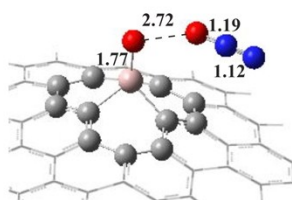

TS-4

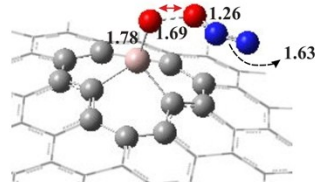

FS-4

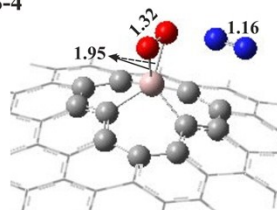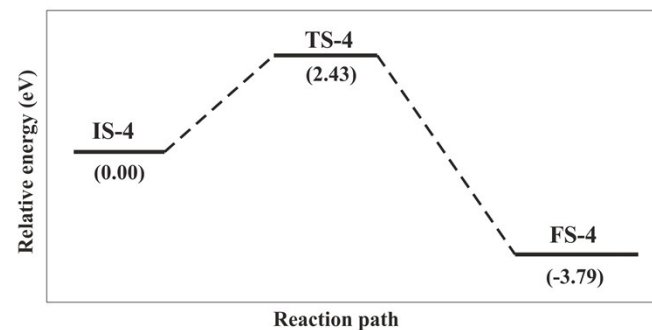

### Ti-graphene

IS-5

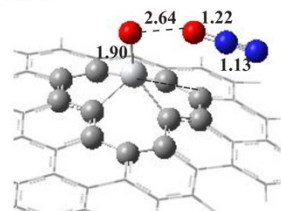

TS-5

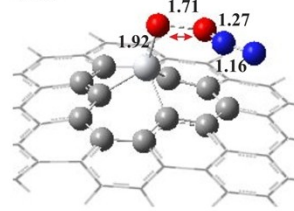

FS-5

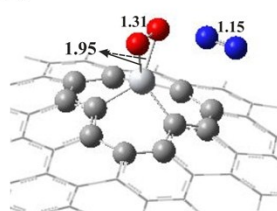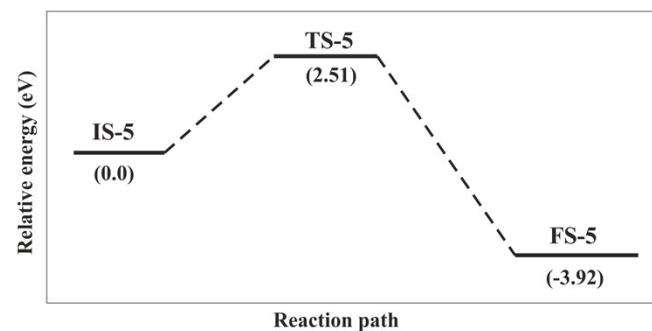

Supplement: c6ra04326g1.pdf [file c6ra04326g1.pdf]
